# Supplementary material for: Development of a Honey Bee RNA Virus Vector Based on the Genome of a Deformed Wing Virus
Source: MDPI journal article supplement (doi:10.3390/v12040374), 2020-03-28
Supplement: s1 [file s1]

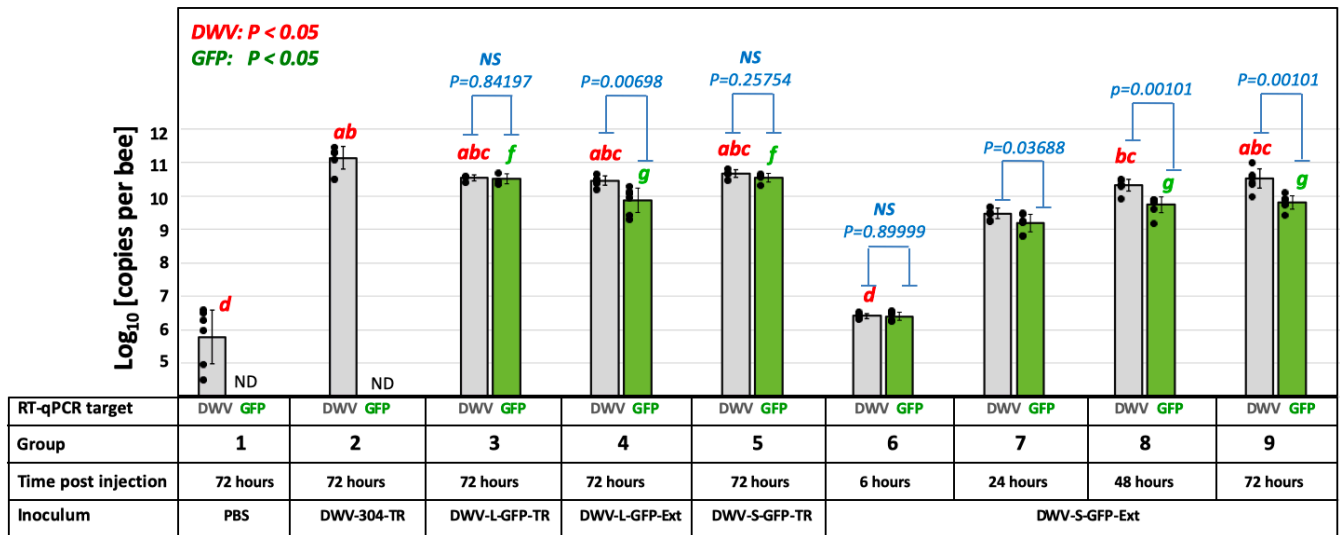

**Figure S2. Replication of the GFP-tagged DWV in honey bee pupae analyzed using one-way ANOVA followed by Tukey post-hoc test.** Average copy numbers of DWV and GFP RNA per pupa revealed by RT-qPCR are shown as the light grey and green graphs, respectively, the error bars show  $\pm$  standard deviation (SD), black dots show DWV RNA or GFP RNA copy numbers in individual pupae. Treatments are shown below the graphs; Inocula: PBS - phosphate buffered saline; suffix -TR, *in vitro* RNA transcript; suffix -Ext, filtered extract from the pupae infected with the corresponding *in vitro* RNA transcript. Red letters above the bars indicate significantly and non-significantly different groups ( $P < 0.01$ ). Blue bars – statistical significance of the DWV and GFP copy numbers within the same group NS - non significant,  $P > 0.05$ ). Statistical analyses of viral data, log-transformed copy numbers of DWV and GFP RNA per pupa, were conducted by one-way ANOVA followed by Tukey post-hoc test to identify differences between the groups ( $p < 0.05$ ).
